# Supplementary material for: Design of bimetallic atomic catalysts for CO2 reduction based on an effective descriptor
Source: Royal Society of Chemistry journal article supplement (doi:10.1039/d0ta11012d), 2021-01-01
Supplement: d0ta11012d1.pdf [file d0ta11012d1.pdf]

## Supporting Information for

### **Design of Bimetallic Atomic Catalysts for CO<sub>2</sub> Reduction Based on an Effective Descriptor**

*Xin Guan, Wang Gao,\* Qing Jiang\**

Key Laboratory of Automobile Materials, Ministry of Education, Department of  
Materials Science and Engineering, Jilin University 130022, Changchun, China.

E-mail: [wgao@jlu.edu.cn](mailto:wgao@jlu.edu.cn) [jiangq@jlu.edu.cn](mailto:jiangq@jlu.edu.cn)

## Competition of COOH and HCOO formation in gas phase

We first study the adsorption properties of the intermediates of CO<sub>2</sub> reduction on BACs. For X atoms have strong interaction with O atom (from the IIIB group to the VIB group), the corresponding BACs prefer to form \*HCOO in bidentate adsorption configuration (the two O atoms bind to M and X respectively), while for X have moderate or weak interaction with O atom (from the VIIB group to the IIB group), the BACs adsorb \*COOH and \*HCOO with onefold configuration with C (O) atom binding to M site.<sup>1</sup> These properties prove the adsorption properties of TMs in SACs (M-N<sub>4</sub>-Gra) can be used for designing BACs (MX-N<sub>6</sub>-Gra), thus the MX-N<sub>6</sub>-Gras with X from the VIIB group to the IIB group show selectivity to COOH rather than HCOO, which are potentially active for CO production.

## Comparison between our descriptor and other descriptors

To justify the performance of our descriptor, we fit the adsorption energy of \*CO, \*COOH, and \*HCOO of BACs with other type descriptors, such as  $\varphi$ ,<sup>2</sup>  $S_d$  (the number of *d*-electrons of transition-metal element),  $S_v$  (the number of *d*- and *s*-electrons of transition-metal element) and  $\chi$  (the electronegativity of transition-metal element), see Figure S3~S6. We find that our descriptor  $\psi$  has better performance than the other descriptors in correlating with the adsorption energy of BACs with bigger R<sup>2</sup>.

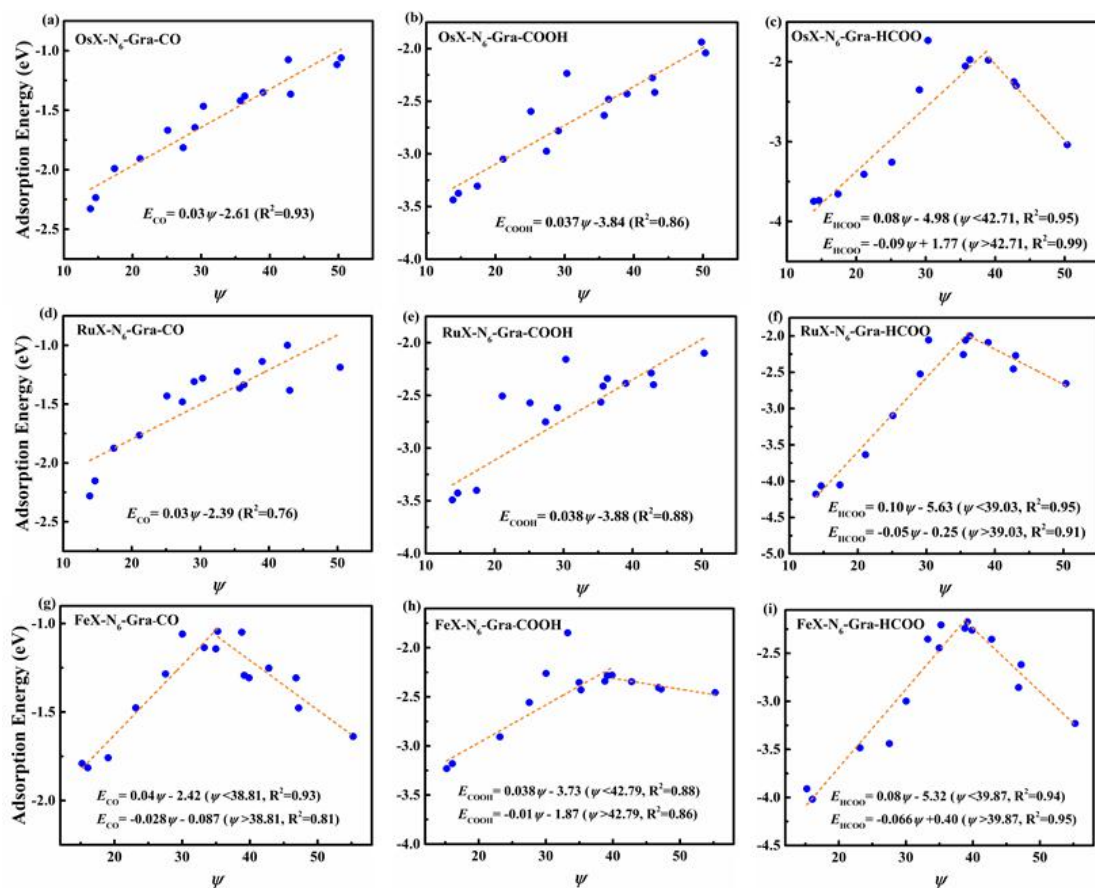

**Figure S1.** Adsorption energy of \*CO, \*COOH and \*HCOO on MX-N<sub>6</sub>-Gra (M=Os, Ru, Fe)

versus  $\psi_1$ .

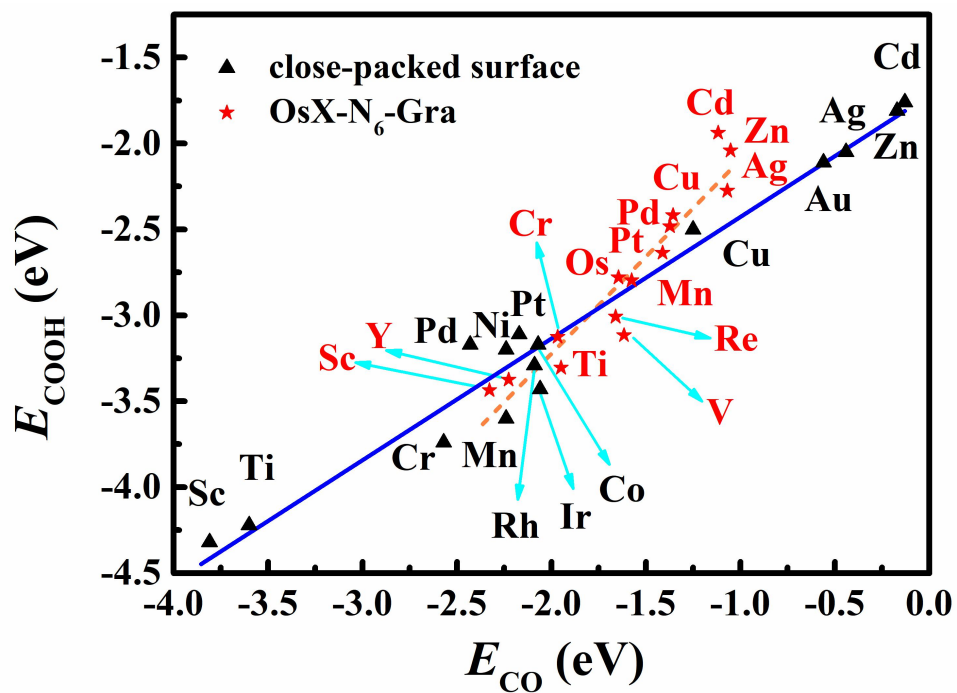

**Figure S2.** Correlation between  $E_{CO}$  and  $E_{COOH}$  for both OsX-N<sub>6</sub>-Gra (red pentagram) and close-packed surfaces<sup>3</sup> (black triangle). The slope of  $E_{CO}$  versus  $E_{COOH}$  on OsX-N<sub>6</sub>-Gra is bigger than that on close-packed surfaces.

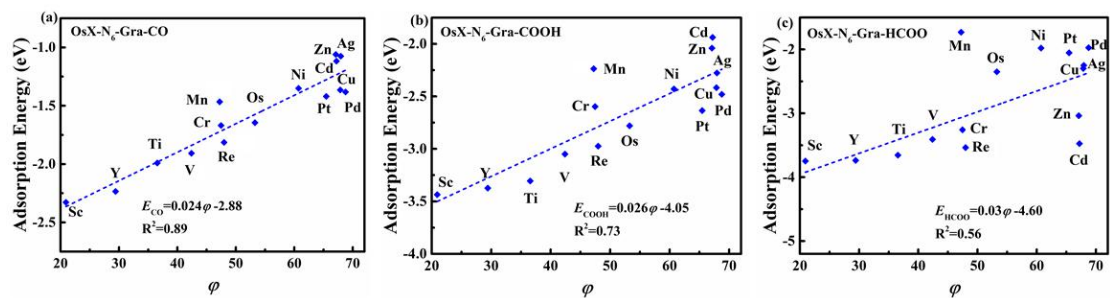

**Figure S3.** Adsorption energy of \*CO, \*COOH and \*HCOO on OsX-N<sub>6</sub>-Gra with respect to descriptor  $\varphi$  in (a), (b) and (c) respectively,  $^2 \varphi = \sqrt{S_{d1}S_{d2}} \frac{\chi_{M1} + \chi_{M2} + n_N \chi_N}{\chi_{C/O}}$ . (where  $S_{d1}$  and  $S_{d2}$  represent the number of *d*-electrons of each TM atom respectively,  $\chi_{M1}$  and  $\chi_{M2}$  represent the electronegativity of each TM atom respectively,  $n_N$  represent the number of the nitrogen atoms in the active site,  $\chi_N$  represent the electronegativity of nitrogen atom,  $\chi_{C/O}$  represents the electronegativity of the terminal atom of adsorbate).

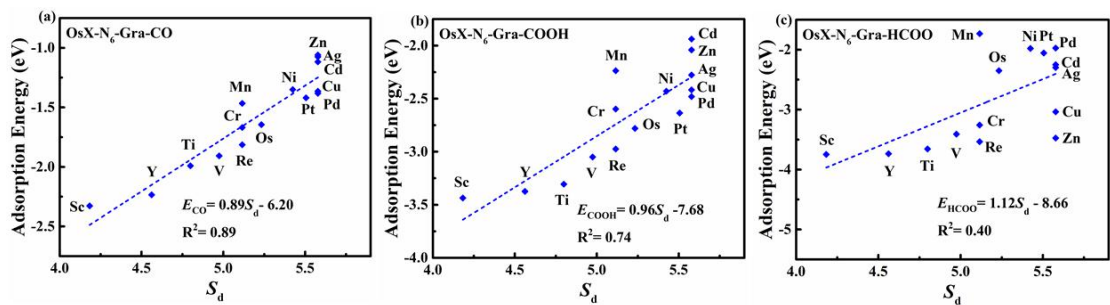

**Figure S4.** Adsorption energy of \*CO, \*COOH and \*HCOO on OsX-N<sub>6</sub>-Gra with respect to descriptor  $S_d$  ( $S_d$  is the number of *d*-electrons of transition-metal element) in (a), (b) and (c) respectively.

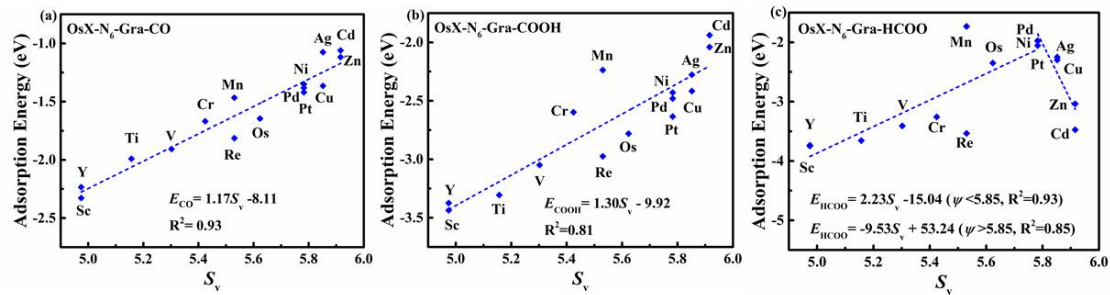

**Figure S5.** Adsorption energy of \*CO, \*COOH and \*HCOO on OsX-N<sub>6</sub>-Gra with respect to descriptor  $S_v$  ( $S_v$  is the valence-electron number of transition-metal element) in (a), (b) and (c) respectively.

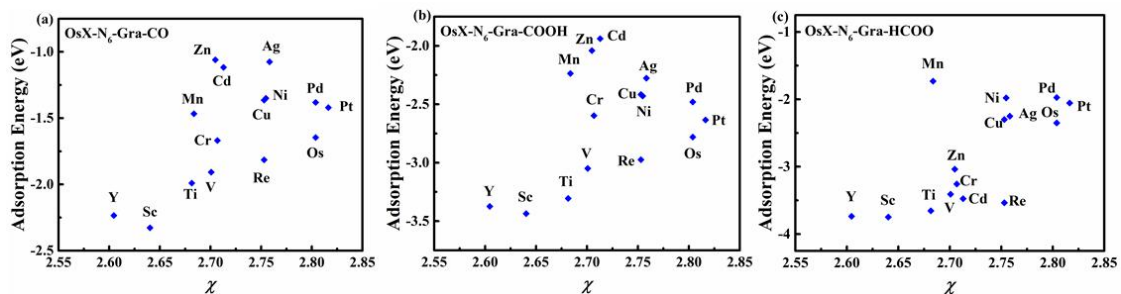

**Figure S6.** Adsorption energy of \*CO, \*COOH and \*HCOO on OsX-N<sub>6</sub>-Gra with respect to descriptor  $\chi$  ( $\chi$  is the electronegativity of transition metal element) in (a), (b) and (c) respectively.

**Table S1** The value of  $U^0$  of each step in  $\text{CO}_2 \rightarrow \text{CO}$ .<sup>4</sup>

| Step                                    | $U^0$ |
|-----------------------------------------|-------|
| $\text{CO}_2 \rightarrow * \text{COOH}$ | -0.11 |
| $* \text{COOH} \rightarrow * \text{CO}$ | -0.08 |

**Table S2** The adsorption energy of  $* \text{CO}$  and  $* \text{HCOO}$  on SACs.<sup>5</sup>

| M-N <sub>4</sub> -Gra  | $E_{\text{CO}}$ | M-N <sub>4</sub> -G    | $E_{\text{HCOO}}$ |
|------------------------|-----------------|------------------------|-------------------|
| Os-N <sub>4</sub> -Gra | -2.93           | Hf-N <sub>4</sub> -Gra | -3.56             |
| Ru-N <sub>4</sub> -Gra | -2.87           | Zr-N <sub>4</sub> -Gra | -3.37             |
| Re-N <sub>4</sub> -Gra | -2.81           | Nb-N <sub>4</sub> -Gra | -3.23             |
| W-N <sub>4</sub> -Gra  | -2.54           | W-N <sub>4</sub> -Gra  | -3.21             |
| Fe-N <sub>4</sub> -Gra | -2.49           | Ta-N <sub>4</sub> -Gra | -3.07             |
| Mn-N <sub>4</sub> -Gra | -2.48           | Y-N <sub>4</sub> -Gra  | -2.95             |
| Mo-N <sub>4</sub> -Gra | -2.45           | Ti-N <sub>4</sub> -Gra | -2.86             |
| Cr-N <sub>4</sub> -Gra | -2.44           | Mo-N <sub>4</sub> -Gra | -2.84             |
| V-N <sub>4</sub> -Gra  | -2.21           | Sc-N <sub>4</sub> -Gra | -2.81             |
| Ta-N <sub>4</sub> -Gra | -2.17           | V-N <sub>4</sub> -Gra  | -2.62             |
| Nb-N <sub>4</sub> -Gra | -2.02           | Re-N <sub>4</sub> -Gra | -2.51             |
| Hf-N <sub>4</sub> -Gra | -1.77           | Cr-N <sub>4</sub> -Gra | -1.99             |
| Ti-N <sub>4</sub> -Gra | -1.65           | Mn-N <sub>4</sub> -Gra | -1.39             |
| Ir-N <sub>4</sub> -Gra | -1.53           | Cd-N <sub>4</sub> -Gra | -0.96             |
| Zr-N <sub>4</sub> -Gra | -1.43           | Fe-N <sub>4</sub> -Gra | -0.79             |
| Ag-N <sub>4</sub> -Gra | -1.28           | Os-N <sub>4</sub> -Gra | -0.77             |
| Co-N <sub>4</sub> -Gra | -1.05           | Ru-N <sub>4</sub> -Gra | -0.66             |
| Y-N <sub>4</sub> -Gra  | -1.03           | Zn-N <sub>4</sub> -Gra | -0.50             |
| Sc-N <sub>4</sub> -Gra | -0.96           | Co-N <sub>4</sub> -Gra | -0.31             |
| Rh-N <sub>4</sub> -Gra | -0.91           | Rh-N <sub>4</sub> -Gra | -0.13             |
| Cd-N <sub>4</sub> -Gra | -0.29           | Ag-N <sub>4</sub> -Gra | -0.05             |
| Cu-N <sub>4</sub> -Gra | -0.26           | Ir-N <sub>4</sub> -Gra | -0.05             |
| Zn-N <sub>4</sub> -Gra | -0.18           | Cu-N <sub>4</sub> -Gra | 0.46              |
| Pd-N <sub>4</sub> -Gra | -0.11           | Au-N <sub>4</sub> -Gra | 0.46              |
| Ni-N <sub>4</sub> -Gra | -0.05           | Ni-N <sub>4</sub> -Gra | 0.71              |
| Pt-N <sub>4</sub> -Gra | -0.04           | Pd-N <sub>4</sub> -Gra | 0.97              |
| Au-N <sub>4</sub> -Gra | 0.04            | Pt-N <sub>4</sub> -Gra | 1.08              |

**Table S3** Summary of valence-electron number  $S_{v1}$ ,  $S_{v2}$  and  $S_{v3}$  of transition metal dopant and nitrogen atom, the electronegativity  $\chi_1$ ,  $\chi_2$  and  $\chi_3$  of transition metal element and nitrogen atom, and descriptor  $\psi$  for MX-N<sub>6</sub>-Gra.

| MX-N <sub>6</sub> -Gra   | $S_{v1}$ | $S_{v2}$ | $S_{v3}$ | $\chi_1$ | $\chi_2$ | $\chi_3$ | $\psi$ |
|--------------------------|----------|----------|----------|----------|----------|----------|--------|
| OsSc-N <sub>6</sub> -Gra | 8        | 3        | 5        | 2.2      | 1.36     | 3.04     | 9.37   |
| OsY-N <sub>6</sub> -Gra  | 8        | 3        | 5        | 2.2      | 1.22     | 3.04     | 9.50   |
| OsTi-N <sub>6</sub> -Gra | 8        | 4        | 5        | 2.2      | 1.54     | 3.04     | 9.92   |
| OsV-N <sub>6</sub> -Gra  | 8        | 5        | 5        | 2.2      | 1.63     | 3.04     | 10.41  |
| OsCr-N <sub>6</sub> -Gra | 8        | 6        | 5        | 2.2      | 1.66     | 3.04     | 10.87  |
| OsRe-N <sub>6</sub> -Gra | 8        | 7        | 5        | 2.2      | 1.9      | 3.04     | 11.11  |
| OsOs-N <sub>6</sub> -Gra | 8        | 8        | 5        | 2.2      | 2.2      | 3.04     | 11.27  |
| OsMn-N <sub>6</sub> -Gra | 8        | 7        | 5        | 2.2      | 1.55     | 3.04     | 11.40  |
| OsPt-N <sub>6</sub> -Gra | 8        | 10       | 5        | 2.2      | 2.28     | 3.04     | 11.87  |
| OsPd-N <sub>6</sub> -Gra | 8        | 10       | 5        | 2.2      | 2.2      | 3.04     | 11.93  |
| OsNi-N <sub>6</sub> -Gra | 8        | 10       | 5        | 2.2      | 1.91     | 3.04     | 12.14  |
| OsAg-N <sub>6</sub> -Gra | 8        | 11       | 5        | 2.2      | 1.93     | 3.04     | 12.41  |
| OsCu-N <sub>6</sub> -Gra | 8        | 11       | 5        | 2.2      | 1.9      | 3.04     | 12.44  |
| OsCd-N <sub>6</sub> -Gra | 8        | 12       | 5        | 2.2      | 1.69     | 3.04     | 12.90  |
| OsZn-N <sub>6</sub> -Gra | 8        | 12       | 5        | 2.2      | 1.65     | 3.04     | 12.94  |
| RuSc-N <sub>6</sub> -Gra | 8        | 3        | 5        | 2.2      | 1.36     | 3.04     | 9.37   |
| RuY-N <sub>6</sub> -Gra  | 8        | 3        | 5        | 2.2      | 1.22     | 3.04     | 9.50   |
| RuTi-N <sub>6</sub> -Gra | 8        | 4        | 5        | 2.2      | 1.54     | 3.04     | 9.92   |
| RuV-N <sub>6</sub> -Gra  | 8        | 5        | 5        | 2.2      | 1.63     | 3.04     | 10.41  |
| RuCr-N <sub>6</sub> -Gra | 8        | 6        | 5        | 2.2      | 1.66     | 3.04     | 10.87  |
| RuRe-N <sub>6</sub> -Gra | 8        | 7        | 5        | 2.2      | 1.9      | 3.04     | 11.11  |
| RuOs-N <sub>6</sub> -Gra | 8        | 8        | 5        | 2.2      | 2.2      | 3.04     | 11.28  |
| RuMn-N <sub>6</sub> -Gra | 8        | 7        | 5        | 2.2      | 1.55     | 3.04     | 11.40  |
| RuCo-N <sub>6</sub> -Gra | 8        | 9        | 5        | 2.2      | 1.88     | 3.04     | 11.85  |
| RuPt-N <sub>6</sub> -Gra | 8        | 10       | 5        | 2.2      | 2.28     | 3.04     | 11.87  |
| RuPd-N <sub>6</sub> -Gra | 8        | 10       | 5        | 2.2      | 2.2      | 3.04     | 11.93  |
| RuNi-N <sub>6</sub> -Gra | 8        | 10       | 5        | 2.2      | 1.91     | 3.04     | 12.14  |
| RuAg-N <sub>6</sub> -Gra | 8        | 11       | 5        | 2.2      | 1.93     | 3.04     | 12.41  |
| RuCu-N <sub>6</sub> -Gra | 8        | 11       | 5        | 2.2      | 1.9      | 3.04     | 12.44  |
| RuZn-N <sub>6</sub> -Gra | 8        | 12       | 5        | 2.2      | 1.65     | 3.04     | 12.94  |
| FeSc-N <sub>6</sub> -Gra | 8        | 3        | 5        | 1.83     | 1.36     | 3.04     | 9.59   |
| FeY-N <sub>6</sub> -Gra  | 8        | 3        | 5        | 1.83     | 1.22     | 3.04     | 9.72   |
| FeTi-N <sub>6</sub> -Gra | 8        | 4        | 5        | 1.83     | 1.54     | 3.04     | 10.15  |
| FeV-N <sub>6</sub> -Gra  | 8        | 5        | 5        | 1.83     | 1.63     | 3.04     | 10.65  |
| FeCr-N <sub>6</sub> -Gra | 8        | 6        | 5        | 1.83     | 1.66     | 3.04     | 11.12  |
| FeRe-N <sub>6</sub> -Gra | 8        | 7        | 5        | 1.83     | 1.9      | 3.04     | 11.37  |



|                          |   |    |   |      |      |      |       |
|--------------------------|---|----|---|------|------|------|-------|
| FeMn-N <sub>6</sub> -Gra | 8 | 7  | 5 | 1.83 | 1.55 | 3.04 | 11.66 |
| FeFe-N <sub>6</sub> -Gra | 8 | 8  | 5 | 1.83 | 1.83 | 3.04 | 11.81 |
| FeRh-N <sub>6</sub> -Gra | 8 | 9  | 5 | 1.83 | 2.28 | 3.04 | 11.83 |
| FeCo-N <sub>6</sub> -Gra | 8 | 9  | 5 | 1.83 | 1.88 | 3.04 | 12.12 |
| FePt-N <sub>6</sub> -Gra | 8 | 10 | 5 | 1.83 | 2.28 | 3.04 | 12.15 |
| FePd-N <sub>6</sub> -Gra | 8 | 10 | 5 | 1.83 | 2.2  | 3.04 | 12.20 |
| FeNi-N <sub>6</sub> -Gra | 8 | 10 | 5 | 1.83 | 1.91 | 3.04 | 12.42 |
| FeAg-N <sub>6</sub> -Gra | 8 | 11 | 5 | 1.83 | 1.93 | 3.04 | 12.70 |
| FeCu-N <sub>6</sub> -Gra | 8 | 11 | 5 | 1.83 | 1.9  | 3.04 | 12.73 |
| FeZu-N <sub>6</sub> -Gra | 8 | 11 | 5 | 1.83 | 2.54 | 3.04 | 13.24 |

**Table S4** The adsorption energy of \*CO, \*COOH and \*HCOO on MX-N<sub>6</sub>-Gra.

| MX-N <sub>6</sub> -Gra   | $E_{CO}$ | $E_{COOH}$ | $E_{HCOO}$ |
|--------------------------|----------|------------|------------|
| OsSc-N <sub>6</sub> -Gra | -2.33    | -3.44      | -3.75      |
| OsY-N <sub>6</sub> -Gra  | -2.23    | -3.37      | -3.74      |
| OsTi-N <sub>6</sub> -Gra | -1.99    | -3.31      | -3.66      |
| OsV-N <sub>6</sub> -Gra  | -1.91    | -3.05      | -3.41      |
| OsCr-N <sub>6</sub> -Gra | -1.67    | -2.60      | -3.26      |
| OsRe-N <sub>6</sub> -Gra | -1.81    | -2.97      | -3.54      |
| OsOs-N <sub>6</sub> -Gra | -1.65    | -2.78      | -2.35      |
| OsMn-N <sub>6</sub> -Gra | -1.47    | -2.24      | -1.73      |
| OsPt-N <sub>6</sub> -Gra | -1.42    | -2.63      | -2.05      |
| OsPd-N <sub>6</sub> -Gra | -1.38    | -2.48      | -1.97      |
| OsNi-N <sub>6</sub> -Gra | -1.35    | -2.43      | -1.98      |
| OsAg-N <sub>6</sub> -Gra | -1.08    | -2.28      | -2.25      |
| OsCu-N <sub>6</sub> -Gra | -1.36    | -2.42      | -2.30      |
| OsCd-N <sub>6</sub> -Gra | -1.12    | -1.94      | -3.48      |
| OsZn-N <sub>6</sub> -Gra | -1.06    | -2.04      | -3.04      |
| RuSc-N <sub>6</sub> -Gra | -2.28    | -3.49      | -4.18      |
| RuY-N <sub>6</sub> -Gra  | -2.15    | -3.43      | -4.06      |
| RuTi-N <sub>6</sub> -Gra | -1.87    | -3.40      | -4.05      |
| RuV-N <sub>6</sub> -Gra  | -1.76    | -2.51      | -3.64      |
| RuCr-N <sub>6</sub> -Gra | -1.43    | -2.57      | -3.10      |
| RuRe-N <sub>6</sub> -Gra | -1.48    | -2.75      | -3.46      |
| RuOs-N <sub>6</sub> -Gra | -1.31    | -2.62      | -2.52      |
| RuMn-N <sub>6</sub> -Gra | -1.28    | -2.16      | -2.06      |
| RuCo-N <sub>6</sub> -Gra | -1.22    | -2.56      | -2.26      |
| RuPt-N <sub>6</sub> -Gra | -1.36    | -2.41      | -2.06      |
| RuPd-N <sub>6</sub> -Gra | -1.34    | -2.34      | -2.00      |
| RuNi-N <sub>6</sub> -Gra | -1.14    | -2.39      | -2.09      |
| RuAg-N <sub>6</sub> -Gra | -1.00    | -2.29      | -2.46      |
| RuCu-N <sub>6</sub> -Gra | -1.38    | -2.40      | -2.27      |
| RuZn-N <sub>6</sub> -Gra | -1.19    | -2.10      | -2.66      |
| FeSc-N <sub>6</sub> -Gra | -1.79    | -3.23      | -3.91      |
| FeY-N <sub>6</sub> -Gra  | -1.81    | -3.18      | -4.02      |
| FeTi-N <sub>6</sub> -Gra | -1.76    | -3.91      | -4.41      |
| FeV-N <sub>6</sub> -Gra  | -1.48    | -2.91      | -3.48      |
| FeCr-N <sub>6</sub> -Gra | -1.28    | -2.56      | -3.44      |
| FeRe-N <sub>6</sub> -Gra | -1.06    | -2.26      | -3.00      |
| FeMn-N <sub>6</sub> -Gra | -1.14    | -1.85      | -2.35      |
| FeFe-N <sub>6</sub> -Gra | -1.14    | -2.35      | -2.44      |
| FeRh-N <sub>6</sub> -Gra | -1.04    | -2.43      | -2.21      |
| FeCo-N <sub>6</sub> -Gra | -1.05    | -2.34      | -2.24      |

|                          |       |       |       |
|--------------------------|-------|-------|-------|
| FePt-N <sub>6</sub> -Gra | -1.29 | -2.28 | -2.17 |
| FePd-N <sub>6</sub> -Gra | -1.31 | -2.28 | -2.26 |
| FeNi-N <sub>6</sub> -Gra | -1.25 | -2.35 | -2.35 |
| FeAg-N <sub>6</sub> -Gra | -1.31 | -2.41 | -2.86 |
| FeCu-N <sub>6</sub> -Gra | -1.48 | -2.42 | -2.62 |
| FeZu-N <sub>6</sub> -Gra | -1.64 | -2.46 | -3.23 |

**Table S5** Reaction free energy for CO<sub>2</sub> reduction to HCOOH at zero applied voltage (vs RHE) and 298 K and overpotential on different catalysts in the gas phase.

| MX-N <sub>6</sub> -Gr<br>a   | CO <sub>2</sub> →*HCOO<br>(eV) | *HCOO→*HCOOH<br>(eV) | *HCOOH→HCOOH<br>(eV) | *+H→<br>*H(eV) | η (V) |
|------------------------------|--------------------------------|----------------------|----------------------|----------------|-------|
| OsZn-N <sub>6</sub> -<br>Gra | 0.11                           | -0.11                | 0.18                 | 0.39           | -0.09 |
| RuZn-N <sub>6</sub> -<br>Gra | 0.38                           | -0.46                | 0.25                 | 0.47           | 0.18  |
| FeZn-N <sub>6</sub> -<br>Gra | -0.03                          | 0.78                 | -0.56                | 0.22           | 0.58  |

**Table S6** Reaction free energy for CO<sub>2</sub> reduction to CO at zero applied voltage (vs RHE) and 298

K and overpotential on different atomic catalysts in the gas phase.

| MX-N <sub>6</sub> -G<br>ra   | CO <sub>2</sub> →*COO<br>H(eV) | *COOH→*CO<br>(eV) | *CO→CO(eV) | *+H→H(eV) | η (V) |
|------------------------------|--------------------------------|-------------------|------------|-----------|-------|
| OsPd-N <sub>6</sub> -<br>Gra | 0.41                           | -0.54             | 0.80       | 0.01      | 0.30  |
| RuCo-N <sub>6</sub> -<br>Gra | 0.36                           | -0.28             | 0.57       | -0.06     | 0.25  |
| RuNi-N <sub>6</sub> -<br>Gra | 0.51                           | -0.38             | 0.53       | 0.14      | 0.40  |
| RuAg-N <sub>6</sub> -<br>Gra | 0.56                           | -0.28             | 0.37       | 0.21      | 0.45  |
| RuCu-N <sub>6</sub> -<br>Gra | 0.40                           | -0.44             | 0.70       | 0.11      | 0.29  |
| FeRh-N <sub>6</sub> -<br>Gra | 0.49                           | -0.28             | 0.44       | 0.17      | 0.38  |
| FeCo-N <sub>6</sub> -<br>Gra | 0.49                           | -0.31             | 0.47       | 0.20      | 0.38  |
| FePd-N <sub>6</sub> -<br>Gra | 0.54                           | -0.60             | 0.71       | 0.28      | 0.43  |
| FePt-N <sub>6</sub> -<br>Gra | 0.51                           | -0.63             | 0.77       | 0.33      | 0.40  |
| PdRu-N <sub>6</sub> -<br>Gra | 0.48                           | -0.58             | 0.77       | 0.11      | 0.37  |

## Reference

- [1] H. He, C. Morrissey, L. A. Curtiss and P. Zapol, *J. Phys. Chem. C*, 2018, **122**, 28629-28636.
- [2] H. Xu, D. Cheng, D. Cao and X. C. Zeng, *Nat. Catal.*, 2018, **1**, 339-348.
- [3] W. Gao, Y. Chen, B. Li, S. P. Liu, X. Liu and Q. Jiang, *Nat. Commun.*, 2020, **11**, 1196.
- [4] X. Nie, M. R. Esopi, M. J. Janik and A. Asthagiri, *Angew. Chem. Int. Ed.*, 2013, **52**, 2459–2462.
- [5] X. Guan, C. X. Zhao, X. Liu, S. P. Liu and W. Gao, *J. Phys. Chem. C*, **124**, 25898-25906.
